# Supplementary material
Source: PubMed Central journal article supplement (PMC8013045)
Supplement: 14-00214.pdf [file 14-00214.pdf]

**On-line Table 1: Characterization of the investigated MCA aneurysms**

|                           | Case 1            | Case 2           |
|---------------------------|-------------------|------------------|
| Sex                       | Female            | Female           |
| Age (yr)                  | 83                | 63               |
| Geometric parameters      |                   |                  |
| Neck (mm)                 | 5.7               | 5.3              |
| Height (mm)               | 8.2               | 8.0              |
| Maximum diameter (mm)     | 11.6              | 10.5             |
| Size (mm)                 | 11.4 × 8.2 × 8.1  | 10.2 × 8.3 × 7.0 |
| Risk factors              |                   |                  |
| Hypertension              | —                 | +                |
| Diabetes mellitus         | —                 | —                |
| Dyslipidemia              | —                 | —                |
| History: aneurysm rupture | —                 | —                |
| Family history: aneurysm  | —                 | —                |
| Smoking                   | —                 | +                |
| Body mass index           | 18.9              | 21.8             |
| Treatment                 | Coil embolization | Neck clipping    |

**On-line Table 2: List of the groups that participated in the CFD Rupture Challenge 2013**

| Group                         | Affiliation                                                                      | Origin         |
|-------------------------------|----------------------------------------------------------------------------------|----------------|
| W. Fu, A. Qiao                | Beijing University of Technology                                                 | China          |
| S. Ramalho, N. Marques        | blueCAPE Lda-CAE solutions                                                       | Portugal       |
| P. Richardson                 | Cambridge University                                                             | UK             |
| S. Sanchi                     | CFS Engineering                                                                  | Switzerland    |
| J. Osman, L. Goubergrits      | Charité-Universitätsmedizin Berlin                                               | Germany        |
| J. Hron, H. Švihlová          | Charles University                                                               | Czech Republic |
| N. Aristokleous, A. Anayiotos | Cyprus University of Technology                                                  | Cyprus         |
| B. Chung, J. Cebal            | George Mason University                                                          | US             |
| A. Passalacqua                | Iowa State University                                                            | US             |
| S. Piskin, K. Pekkan          | Istanbul Technical University                                                    | Turkey         |
| S. Hodis, D. Dragomir-Daescu  | Mayo Clinic                                                                      | US             |
| K. Schumacher, J. Sturgeon    | MRIGlobal                                                                        | US             |
| E. Nordahl                    | North Dakota State University                                                    | US             |
| H. Morales                    | Medisys Philips Research                                                         | France         |
| A. Brown                      | CD-Adapco                                                                        | UK             |
| H. Meng, J. Xiang             | State University of New York at Buffalo                                          | US             |
| P. Menon, P. Albal            | Sun Yat-Sen University–Carnegie Mellon University Joint Institute of Engineering | US             |
| G. Usera, M. Mendina          | Universidad de la Republica                                                      | Uruguay        |
| G. Copelli                    | Università degli Studi di Parma                                                  | Italy          |
| A. Geers                      | Universitat Pompeu Fabra                                                         | Spain          |
| O. Mierka, R. Münster         | University of Dortmund                                                           | Germany        |
| N. Ashton, D. Revell          | University of Manchester                                                         | UK             |
| N.W. Bressloff                | University of Southampton                                                        | UK             |
| O. Khan, K. Valen-Sendstad    | University of Toronto                                                            | Canada         |
| J. Pallares, S. Cito          | University Rovira i Virgili                                                      | Spain          |
| K. Kono                       | Wakayama Rosai Hospital                                                          | Japan          |

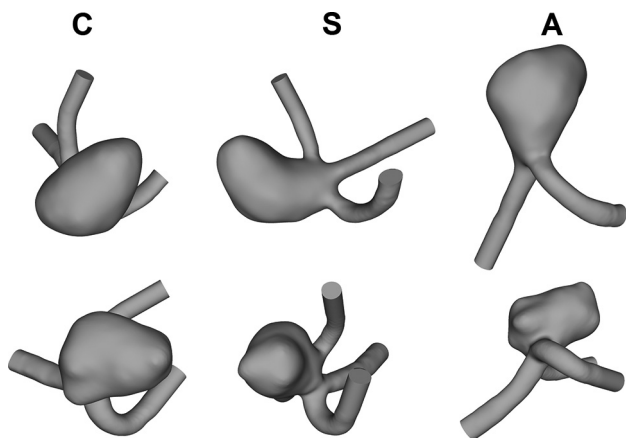

**ON-LINE FIG 1.** Lumen geometries in 3 perspectives (C, coronal; S, sagittal, A, axial views) of the investigated MCA aneurysms that were provided to all participating groups in order to predict the ruptured case and the corresponding rupture site. Case 1 (*top*); case 2 (*bottom*).

**Case 1**  
n=4 (9%)

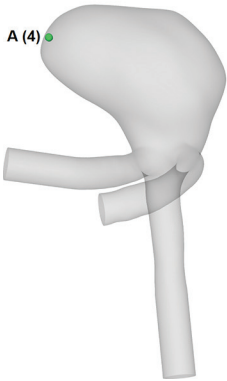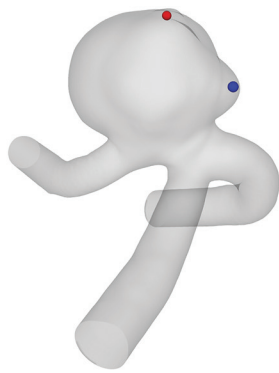

**Case 2**  
n=39 (91%)

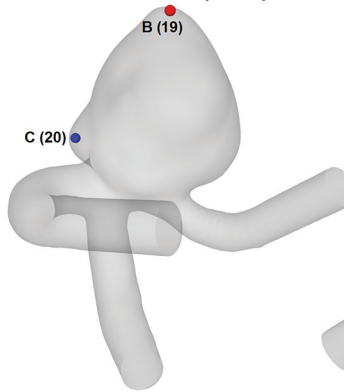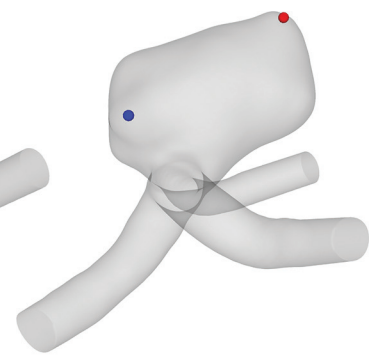

**ON-LINE FIG 2.** Predictions of the ruptured aneurysm and site by the 43 neurosurgeons. Nine percent chose the unruptured case 1, whereas 91% picked the ruptured case 2. Two rupture sites were identified in the second aneurysm with approximately equal distribution.

**Questionnaire**

Two middle cerebral artery aneurysms are shown: unruptured and ruptured ones. The rupture site in the ruptured aneurysm was identified. Predict the ruptured case and the rupture site.

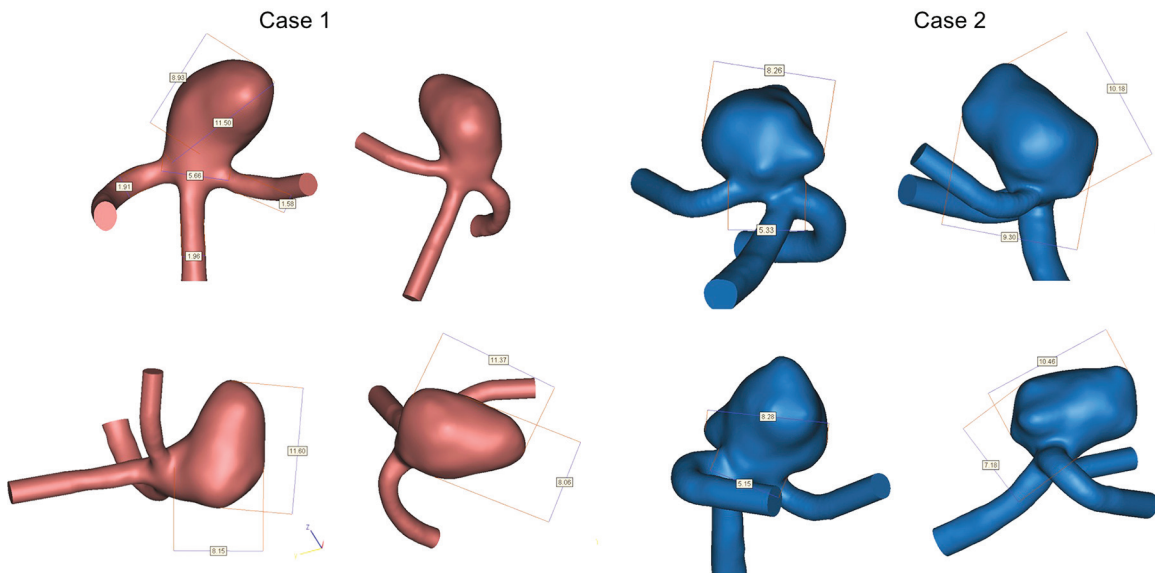

Neck: 5.7 mm, Height: 8.2 mm  
Max: 11.6 mm  
Size : 11.4×8.2×8.1 (M1 diameter: 2.0 mm)

Neck: 5.3 mm, Height: 8.0 mm  
Max: 10.5 mm  
Size : 10.2×8.3×7.0 (M1: 2.0 mm)

Years of experience: \_\_\_\_ years  
Your prediction : The ruptured aneurysm is Case \_\_\_. Encircle a ruptured point that you predicted.  
Provide reasons for the prediction of the rupture case and the rupture point.

**ON-LINE FIG 3.** Questionnaire for the neurosurgeons.

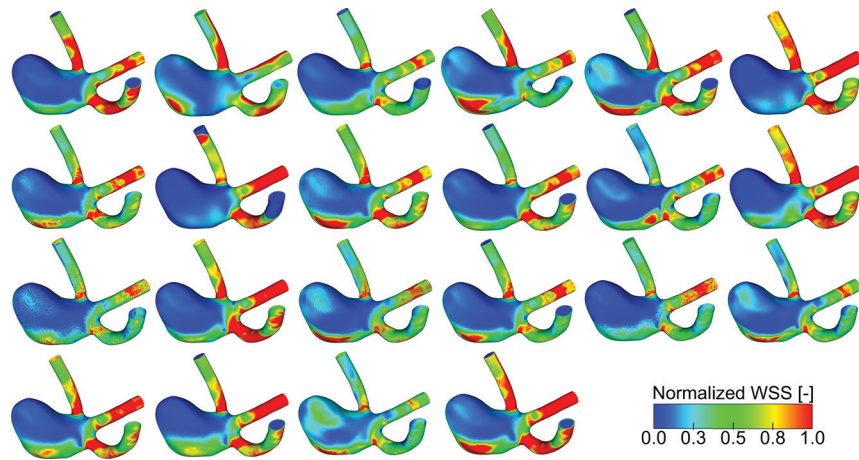

**ON-LINE FIG 4.** Sagittal view of the normalized wall shear stress distribution in the unruptured case 1 predicted by 22 groups with different simulation settings.
